# Supplementary material
Source: Springer Nature journal article supplement (https://www.springermedizin.de/resource/supplementary/12885_2010_2102_MOESM1_ESM.pdf/9460528)

**a** **b** **c** **d** **e** **f** **g**

*TGF $\beta$ -RII*

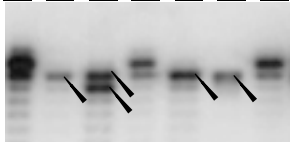

*BAX*

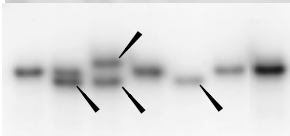

*hMSH3*

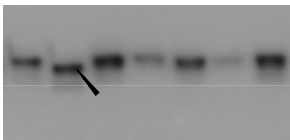

*hMSH6*

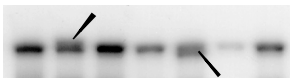

*IGFII-R*

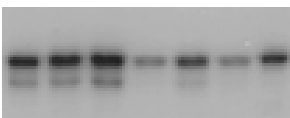

*Fas antigen*

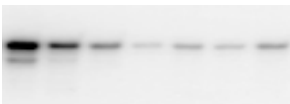

Supplement: MOESM1 [file 9460528]
